# Supplementary material
Source: ML conference proceedings conference paper supplement (https://openreview.net/forum?id=RHDXkRPNQa)
Supplement: supplementary_material [file attachment]

398 **A Proof of Theorem 1 and 2**

399 **Theorem 1** *Single-source edge-wise GNN can learn rule-induced subgraph representation if  $\uplus =$*   
 400  *$+, \oplus = +, \diamond = +, \otimes^1 = \times, \otimes^2 = \times$ . i.e., there exists nonzero  $\alpha_{i,j}$  such that*

$$\mathbf{e}_{u,r_t,v}^k = \sum_{i=1}^k \underbrace{\sum_{(u,r_t,v)} \sum_{(v,y_0,x_0)} \dots \sum_{(x_{i-3},y_{i-2},u)}}_i \alpha_{i1} \mathbf{r}_{r_t} \times \alpha_{i2} \mathbf{r}_{y_0} \times \dots \times \alpha_{ii} \mathbf{r}_{y_{i-2}} \quad (15)$$

401 *Proof* In this case, the rule-induced subgraph representation is:

$$\mathcal{S}_{u,r_t,v} = \sum_{i=1}^k \underbrace{\sum_{(u,r_t,v)} \sum_{(v,y_0,x_0)} \dots \sum_{(x_{i-3},y_{i-2},u)}}_i \alpha_{i1} \mathbf{r}_{r_t} \times \alpha_{i2} \mathbf{r}_{y_0} \times \dots \times \alpha_{ii} \mathbf{r}_{y_{i-2}} \quad (16)$$

402 Then we will show that single-source edge-wise GNN can learn this rule-induced subgraph representation in **induction**.  
 403

$k = 1$ . we have

$$\mathbf{e}_{u,r_t,v}^1 = \mathbf{h}_u^1 + \mathbf{r}_{r_t} = \mathbf{r}_{r_t} + \sum_{(x_0,y_0,u) \in \mathcal{T}} (\mathbf{h}_{x_0}^0 + \mathbf{e}_{x_0,y_0,u}^0) \times \mathbf{r}_{y_0}$$

404 Note that  $\mathbf{e}_{x_0,y_0,u}^0 \neq 0$  if and only if  $(x_0, y_0, u) = (u, r_t, v)$ . However, this is impossible as  $u \neq v$ .  
 405 Thus  $\mathbf{e}_{u,r_t,v}^1$  satisfies the definition of rule-induced subgraph representation.

406  $k = 2$ . we have:

$$\begin{aligned} \mathbf{e}_{u,r_t,v}^2 &= \mathbf{h}_u^2 + \mathbf{e}_{u,r_t,v}^1 = \sum_{(x_0,y_0,u) \in \mathcal{T}} (\mathbf{h}_{x_0}^1 + \mathbf{e}_{x_0,y_0,u}^1) \times \mathbf{r}_{y_0} + \mathbf{r}_{r_t} \\ &= \sum_{(x_0,y_0,u) \in \mathcal{T}} 2\mathbf{h}_{x_0}^1 \times \mathbf{r}_{y_0} + \mathbf{r}_{r_t} \\ &= \sum_{(x_0,y_0,u)} \sum_{(x_1,y_1,x_0)} 2(\mathbf{h}_{x_1}^0 + \mathbf{e}_{x_1,y_1,x_0}^0) \times \mathbf{r}_{y_1} \times \mathbf{r}_{y_0} + \mathbf{r}_{r_t} \\ &= \sum_{(x_0,y_0,u)} \sum_{(x_1,y_1,x_0)} 2\mathbf{e}_{x_1,y_1,x_0}^0 \times \mathbf{r}_{y_1} \times \mathbf{r}_{y_0} + \mathbf{r}_{r_t} \end{aligned} \quad (17)$$

407 We can find that  $\mathbf{e}_{x_1,y_1,x_0}^0 \neq 0$  if and only if  $(x_1, y_1, x_0) = (u, r_t, v)$ , i.e. there exists both  $(u, r_t, v)$   
 408 and  $(v, r_t, u)$ . Obviously,  $\mathbf{e}_{u,r_t,v}^2$  satisfies the definition of rule-induced subgraph representation.

409 Assume that this conclusion exists for  $n \leq k - 1$ . Now we check the  $k$ -th term.

$$\mathbf{e}_{u,r_t,v}^k = \mathbf{h}_u^k + \sum_{i=1}^{k-1} \underbrace{\sum_{(x_0,y_0,u)} \sum_{(x_1,y_1,x_0)} \dots \sum_{(v,y_{i-2},x_0)}}_{i-1} \alpha_{i1} \mathbf{r}_{r_t} \otimes \alpha_{i2} \mathbf{r}_{y_{i-2}} \otimes \dots \otimes \alpha_{ii} \mathbf{r}_{y_0} \quad (18)$$

410 First, we consider  $\mathbf{h}_u^k$ .

$$\begin{aligned}
\mathbf{h}_u^k &= \sum_{(x_0, y_0, u)} (\mathbf{h}_{x_0}^{k-1} + \mathbf{e}_{x_0, y_0, u}^{k-1}) \times \mathbf{r}_{y_0} \\
&= \sum_{(x_0, y_0, u)} \sum_{(x_1, y_1, x_0)} (\mathbf{h}_{x_1}^{k-2} + \mathbf{e}_{x_1, y_1, x_0}^{k-2}) \times \mathbf{r}_{y_1} \times \mathbf{r}_{y_0} + \sum_{(x_0, y_0, u)} \mathbf{e}_{x_0, y_0, u}^{k-1} \times \mathbf{r}_{y_0} \\
&= \underbrace{\sum_{(x_0, y_0, u)} \sum_{(x_1, y_1, x_0)} \dots \sum_{(x_{k-1}, y_{k-1}, x_{k-2})} \mathbf{e}_{x_{k-1}, y_{k-1}, x_{k-2}}^0 \times \mathbf{r}_{y_{k-1}} \times \mathbf{r}_{y_{k-2}} \times \dots \times \mathbf{r}_{y_0}}_k \\
&\quad + \underbrace{\sum_{(x_0, y_0, u)} \sum_{(x_1, y_1, x_0)} \dots \sum_{(x_{k-2}, y_{k-2}, x_{k-3})} \mathbf{e}_{x_{k-2}, y_{k-2}, x_{k-3}}^1 \times \mathbf{r}_{y_{k-2}} \times \dots \times \mathbf{r}_{y_0}}_{k-1} \\
&\quad + \dots \\
&\quad + \sum_{(x_0, y_0, u)} \mathbf{e}_{x_0, y_0, u}^{k-1} \times \mathbf{r}_{y_0}
\end{aligned} \tag{19}$$

411 Notice that  $\underbrace{\sum_{(x_0, y_0, u)} \sum_{(x_1, y_1, x_0)} \dots \sum_{(x_{k-1}, y_{k-1}, x_{k-2})} \mathbf{e}_{x_{k-1}, y_{k-1}, x_{k-2}}^0 \times \mathbf{r}_{y_{k-1}} \times \mathbf{r}_{y_{k-2}} \times \dots \times \mathbf{r}_{y_0}}_k \neq 0$  if

412 and only if  $(x_{k-1}, y_{k-1}, x_{k-2}) = (u, r_t, v)$ . In this situation, this term is exactly the  $k$ -th term in the  
413 expression of  $\mathbf{e}_{u, r_t, v}^k$ . Now we want to prove that:

$$\begin{aligned}
&\underbrace{\sum_{(x_0, y_0, u)} \sum_{(x_1, y_1, x_0)} \dots \sum_{(x_{k-2}, y_{k-2}, x_{k-3})} \mathbf{e}_{x_{k-2}, y_{k-2}, x_{k-3}}^1 \times \mathbf{r}_{y_{k-2}} \times \dots \times \mathbf{r}_{y_0}}_{k-1} \\
&\quad + \dots \\
&\quad + \sum_{(x_0, y_0, u)} \mathbf{e}_{x_0, y_0, u}^{k-1} \times \mathbf{r}_{y_0}
\end{aligned} \tag{20}$$

414 can be fused in top  $k - 1$  term of Equation. 16. Let's check the  $j$ -th term of Equation. 20.

$$\begin{aligned}
& \underbrace{\sum_{(x_0, y_0, u)} \sum_{(x_1, y_1, x_0)} \dots \sum_{(x_{j-1}, y_{j-1}, x_{j-2})}}_j \mathbf{e}_{x_{j-1}, y_{j-1}, x_{j-2}}^{k-j} \times \mathbf{r}_{y_{j-1}} \times \dots \times \mathbf{r}_{y_0} \\
&= \underbrace{\sum_{(x_0, y_0, u)} \sum_{(x_1, y_1, x_0)} \dots \sum_{(x_{j-1}, y_{j-1}, x_{j-2})}}_j (\mathbf{e}_{x_{j-1}, y_{j-1}, x_{j-2}}^{k-j-1} + \mathbf{h}_{x_{j-1}}^{k-j}) \times \mathbf{r}_{y_{j-1}} \times \dots \times \mathbf{r}_{y_0} \\
&= \underbrace{\sum_{(x_0, y_0, u)} \sum_{(x_1, y_1, x_0)} \dots \sum_{(x_{j-1}, y_{j-1}, x_{j-2})}}_j (\mathbf{e}_{x_{j-1}, y_{j-1}, x_{j-2}}^0 + \mathbf{h}_{x_{j-1}}^{k-j} + \dots + \mathbf{h}_{x_{j-1}}^1) \times \mathbf{r}_{y_{j-1}} \times \dots \times \mathbf{r}_{y_0} \\
&= \underbrace{\sum_{(x_0, y_0, u)} \sum_{(x_1, y_1, x_0)} \dots \sum_{(x_{j-1}, y_{j-1}, x_{j-2})}}_j \mathbf{e}_{x_{j-1}, y_{j-1}, x_{j-2}}^0 \times \mathbf{r}_{y_{j-1}} \times \dots \times \mathbf{r}_{y_0} \\
&+ \underbrace{\sum_{(x_0, y_0, u)} \sum_{(x_1, y_1, x_0)} \dots \sum_{(x_{j-1}, y_{j-1}, x_{j-2})} \sum_{(x_j, y_j, x_{j-1})}}_{j+1} (\mathbf{h}_{x_j}^{k-j-1} + \dots + \mathbf{h}_{x_j}^0 + \mathbf{e}_{x_j, y_j, x_{j-1}}^{k-j-1} + \dots + \mathbf{e}_{x_j, y_j, x_{j-1}}^0) \times \mathbf{r}_{y_{j-1}} \times \dots \times \mathbf{r}_{y_0}
\end{aligned} \tag{21}$$

415 Note that  $\mathbf{e}_{x_{j-1}, y_{j-1}, x_{j-2}}^0 \neq 0$  if and only if  $(x_{j-1}, y_{j-1}, x_{j-2}) = (u, r_t, v)$ , thus the term can be  
416 fused into the  $j$ -th term of Equation. 16.  $\mathbf{e}_{x_j, y_j, x_{j-1}}^0$  can be fused into the  $(j+1)$ -th term and so on.  
417 Therefore, we have:

$$\begin{aligned}
& \underbrace{\sum_{(x_0, y_0, u)} \sum_{(x_1, y_1, x_0)} \dots \sum_{(x_{j-1}, y_{j-1}, x_{j-2})}}_j \mathbf{e}_{x_{j-1}, y_{j-1}, x_{j-2}}^{k-j} \times \mathbf{r}_{y_{j-1}} \times \dots \times \mathbf{r}_{y_0} \\
&= \sum_{i=1}^k \underbrace{\sum_{(u, r_t, v)} \sum_{(v, y_0, x_0)} \dots \sum_{(x_{i-3}, y_{i-2}, u)}}_i \alpha_{i1} \mathbf{r}_{r_t} \times \alpha_{i2} \mathbf{r}_{y_0} \times \dots \times \alpha_{ii} \mathbf{r}_{y_{i-2}}
\end{aligned} \tag{22}$$

418 There, we prove that single-source edge-wise GNN can learn rule-induced subgraph representation in  
419 this case.  $\square$

420 **Theorem 2** Single-source edge-wise GNN can learn rule-induced subgraph representation if  $\oplus =$   
421  $\oplus, \oplus = \oplus, \diamond = \oplus, \otimes^1 = \otimes, \otimes^2 = \otimes$ , where  $\oplus$  and  $\otimes$  are binary operators that satisfy  $0 \oplus a =$   
422  $a, 0 \otimes a = 0$ . i.e., there exists nonzero  $\alpha_{i,j}$  such that

$$\mathbf{e}_{u, r_t, v}^k = \bigoplus_{i=1}^k \underbrace{\bigoplus_{(u, r_t, v)} \bigoplus_{(v, y_0, x_0)} \dots \bigoplus_{(x_{i-3}, y_{i-2}, u)}}_i \alpha_{i1} \mathbf{r}_{r_t} \otimes \alpha_{i2} \mathbf{r}_{y_0} \otimes \dots \otimes \alpha_{ii} \mathbf{r}_{y_{i-2}} \tag{23}$$

423 *Proof* Without loss of generality, we can replace  $+$  with  $\oplus$  and  $\times$  with  $\otimes$  to represent a binary  
424 operator, then we directly get this theorem. Note that we should ensure that  $\oplus$  and  $\otimes$  satisfy  
425  $0 \oplus a = a, 0 \otimes a = 0$ , which we use in the process of proof.  $\square$

## 426 B Details of Datasets

427 We summarize the details of inductive relation prediction benchmark datasets in Table 5.

Table 5: Statistics of three inductive datasets, which contain four different versions individually. We use #E and #R and #TR to denote the number of entities, relations, and triples.

|    |       | WN18RR |       |       | FB15k-237 |      |       | NELL-995 |       |       |
|----|-------|--------|-------|-------|-----------|------|-------|----------|-------|-------|
|    |       | #R     | #E    | #TR   | #R        | #E   | #TR   | #R       | #E    | #TR   |
| v1 | train | 9      | 2746  | 6678  | 183       | 2000 | 5226  | 14       | 10915 | 5540  |
|    | test  | 9      | 922   | 1991  | 146       | 1500 | 2404  | 14       | 225   | 1034  |
| v2 | train | 10     | 6954  | 18968 | 203       | 3000 | 12085 | 88       | 2564  | 10109 |
|    | test  | 10     | 2923  | 4863  | 176       | 2000 | 5092  | 79       | 4937  | 5521  |
| v3 | train | 11     | 12078 | 32150 | 218       | 4000 | 22394 | 142      | 4647  | 20117 |
|    | test  | 11     | 5084  | 7470  | 187       | 3000 | 9137  | 122      | 4921  | 9668  |
| v4 | train | 9      | 3861  | 9842  | 222       | 5000 | 33916 | 77       | 2092  | 9289  |
|    | test  | 9      | 7208  | 15157 | 204       | 3500 | 14554 | 61       | 3294  | 8520  |

## C Implementation Details

In general, our proposed method is implemented in DGL[34] and PyTorch[33] and trained on single GPU of NVIDIA GeForce RTX 3090. We apply Adam optimizer[37] with an initial learning rate of 0.0005. Observing that batch size has little effect on the performance of the model, We adjust batch size as large as possible for different datasets to accelerate training. We use the binary cross entropy loss. The maximum number of training epochs is set to 10. During training, we add reversed edges to fully capture relevant rules. The number of hop  $h$  is set to 3 which is consistent with existing subgraph-based methods. We conduct grid search to obtain optimal hyperparameters, where we search subgraph types in {enclosing, unclosing}, embedding dimensions in {16, 32}, number of GNN layers in {3, 4, 5, 6} and dropout in {0, 0.1, 0.2}. Configuration for the best performance of each dataset is given within the code.
